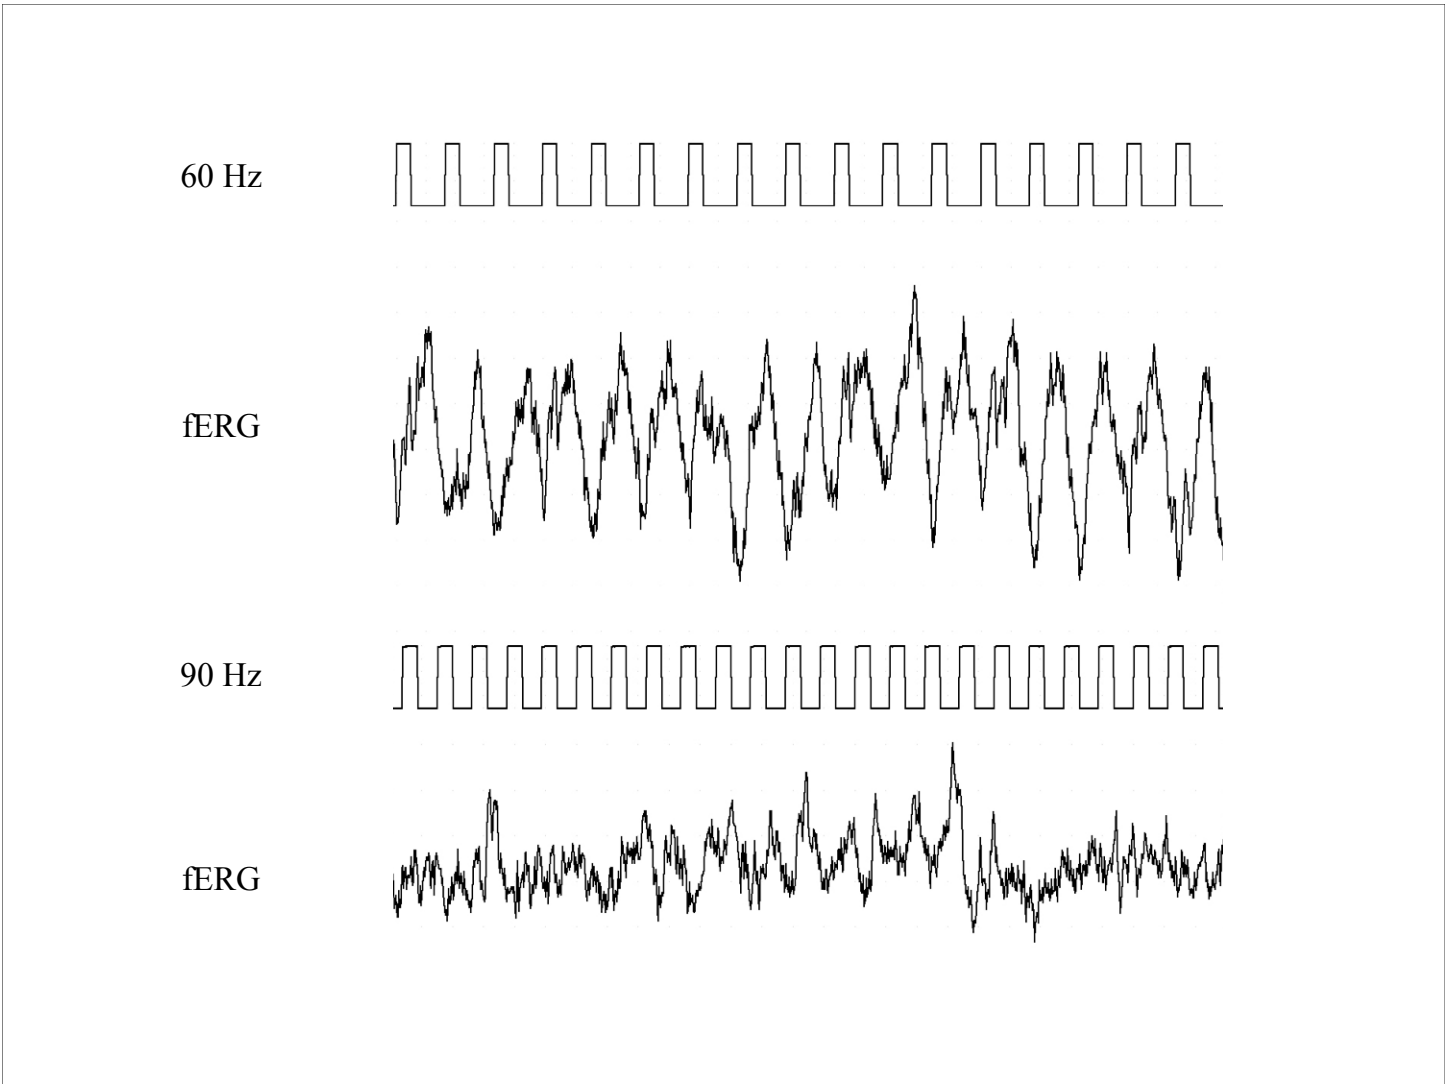

Tuesday, 17 September 2013

**Fig. S1.** Representative samples with low and high flicker electroretinograms (fERGs). The responding wavelets were extracted between 1.1 and 1.5 s of the stimuli and responses. As the flicker rate increases, the fERG wavelets are masked by ambient noise.
